# Supplementary material
Source: Springer Nature journal article supplement (https://www.springermedizin.de/resource/supplementary/12891_2012_1879_MOESM1_ESM.pdf/9508710)

CaMos participants – initial questionnaire, 1996  
n = 9423

Excluded: participants aged 74 yrs or younger at time of initial questionnaire  
n = 7811

All participants aged 75 or older  
n = 1612

Excluded: male participants  
n = 443

Female participants, aged 75 and over  
n = 1169

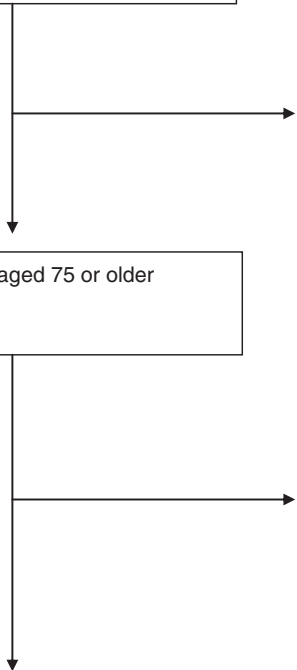

Supplement: MOESM1 [file 9508710]
